# Supplementary material for: Complexity of Nurse Practitioners’ Role in Facilitating a Dignified Death for Long-Term Care Home Residents during the COVID-19 Pandemic
Source: MDPI journal article supplement (doi:10.3390/jpm11050433), 2021-05-19
Supplement: s1 [file s1]

## **Supplementary Material: Table S1**

### **Semi-Structured Interview Guide with Nurse Practitioners**

1. Where do you work as a Nurse Practitioner (NP)?  
*(Probe: day-to-day schedule; tasks that are performed as part of usual role)*
2. What was your role as an NP working in a long-term care (LTC) home before the pandemic?  
*(Probe: clinical, leadership, administrative responsibilities)*
3. What is your opinion on the preparedness for the pandemic of the LTC homes you work at?  
*(Probe: processes in place to ensure preparedness for the pandemic)*
4. Which successful responses by the LTC home to the pandemic did you observe?  
*(Probe: management preparedness, policies and procedures, training for staff, staff capacity)*
5. Did you observe any gaps in pandemic preparedness?  
*(Probe: management preparedness, policies and procedures, training for staff, staff capacity)*
6. Were there any policies, procedures, or protocols established in response to the pandemic in the home(s) that you work at?  
*(Probes: changes in relation to coroner's office; changes in relation to ministry inspectors)*
7. Please describe your role in infection control and prevention?  
*(Probe: role in PPE access, use, and disposal; capacity building activities; developing isolation care plans)*
8. What were your responsibilities in supporting staff during the pandemic?  
*(Probe: availability of emotional support; team support)*
9. Please describe your role in supporting the quality of care for the residents during COVID-19?  
*(Probe: working with residents' families; changes in practices of activities of daily living; maintaining social connectedness; end-of-life care; advanced care planning; residents purposefully walking)*
10. What were some of the challenges that interfered with your work during the pandemic?
11. In your opinion, how could these be prevented in a future pandemic?
12. What helped you in performing your role as an NP during the pandemic?
